# Supplementary material for: Reciprocal immune enhancement of dengue and Zika virus infection in human skin
Source: JCI journal article supplement (doi:10.1172/jci.insight.133653), 2020-01-07
Supplement: sd1 [file 1]

Castanha et al

Supplemental Material

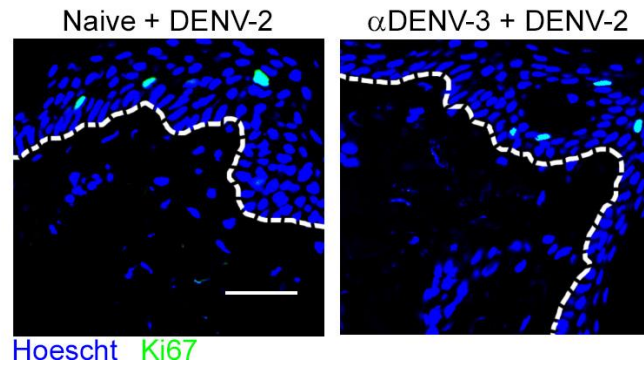

**Figure S1. Dermal myeloid cells lack evidence of proliferation following DENV-2 infection.** Immunofluorescence of skin stained with antibody to Ki67 (green) after inoculation with DENV-2 in skin pretreated with DENV-3 immune sera or naïve sera. Blue staining represents nuclei and dotted lines indicate epidermal-dermal junction. Note scattered Ki67+ cells in epidermis in both conditions, consistent with homeostatic keratinocyte division. Scale bar 50µm.

**Table S1. Binding properties of DENV-3 and ZIKV immune serum to homologous and heterologous virus.** Mean  $\pm$  SEM of IC<sub>50</sub> values (log<sub>10</sub>) of DENV-3 and ZIKV immune serum to homologous and heterologous virus.

| <b>Antigen</b> | <b>IC<sub>50</sub><math>\pm</math>SEM</b> |                                |
|----------------|-------------------------------------------|--------------------------------|
|                | <b><math>\alpha</math>DENV-3</b>          | <b><math>\alpha</math>ZIKV</b> |
| DENV-2         | 3.05 $\pm$ 0.13                           | 1.77 $\pm$ 0.23                |
| DENV-3         | 3.23 $\pm$ 0.05                           | 1.52 $\pm$ 0.24                |
| ZIKV           | 1.81 $\pm$ 0.27                           | 2.07 $\pm$ 0.24                |

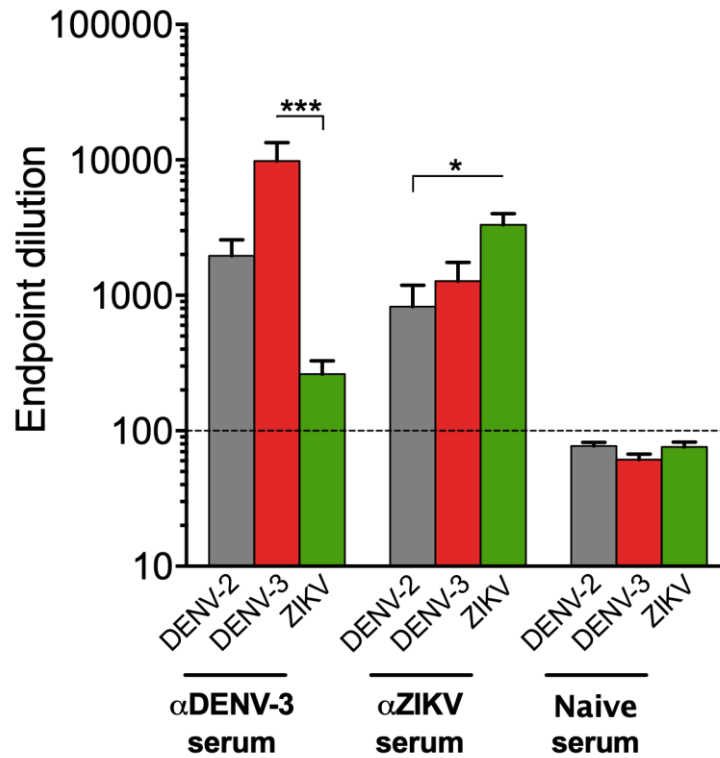

**Figure S2.** Endpoint titers of binding IgG in DENV-3 and ZIKV immune serum to homologous and heterologous virus. Mean  $\pm$  SEM endpoint IgG titer for each data set are indicated. Dotted line represents initial serum dilution. Statistically significant differences were determined through Kruskal-Wallis test, followed by Dunn multiple comparison tests and are marked as \* $p < 0.05$  and \*\*\*  $p < 0.0001$ .
